# Supplementary material for: MOLGENIS VIP: an open-source and modular pipeline for high-throughput and integrated DNA variant analysis
Source: bioRxiv or medRxiv preprint supplement (doi:10.1101/2024.04.11.24305656), 2024-04-26
Supplement: Supplementary file [file media-3.pdf]

| <b>Gene panel<br/>developmental<br/>delay</b> | <b>Gene panel<br/>dilated<br/>cardiomyopathy</b> | <b>Gene panel<br/>clinical exome</b> |
|-----------------------------------------------|--------------------------------------------------|--------------------------------------|
| A2ML1                                         | AARS2                                            | A2M                                  |
| AAAS                                          | ABCC6                                            | A2ML1                                |
| AARS                                          | ABCC9                                            | A4GALT                               |
| AASS                                          | ACAD8                                            | AAAS                                 |
| ABAT                                          | ACAD9                                            | AAGAB                                |
| ABCC8                                         | ACADS                                            | AARS                                 |
| ABCC9                                         | ACADVL                                           | AARS2                                |
| ABCD1                                         | ACTA1                                            | AASS                                 |
| ABCD4                                         | ACTC1                                            | ABAT                                 |
| ABHD5                                         | ACTN2                                            | ABCA1                                |
| ACAD9                                         | ADCY5                                            | ABCA12                               |
| ACADS                                         | AGK                                              | ABCA3                                |
| ACAT1                                         | AGL                                              | ABCA4                                |
| ACO2                                          | AGPAT2                                           | ABCA5                                |
| ACOX1                                         | AHCY                                             | ABCA7                                |
| ACSF3                                         | AIP                                              | ABCB1                                |
| ACSL4                                         | ALG1                                             | ABCB11                               |
| ACTB                                          | ALG6                                             | ABCB4                                |
| ACTG1                                         | ALMS1                                            | ABCB6                                |
| ACTL6A                                        | ALPK3                                            | ABCB7                                |
| ACVR1                                         | ANKRD1                                           | ABCC11                               |
| ACY1                                          | ANKRD11                                          | ABCC2                                |
| ADAM22                                        | ANKS6                                            | ABCC6                                |
| ADAR                                          | ANO5                                             | ABCC8                                |
| ADAT3                                         | APOPT1                                           | ABCC9                                |
| ADGRG1                                        | ARSB                                             | ABCD1                                |
| ADK                                           | ASNA1                                            | ABCD3                                |
| ADNP                                          | ATP5F1E                                          | ABCD4                                |
| ADSL                                          | ATP6V1B2                                         | ABCG2                                |
| AFF2                                          | ATPAF2                                           | ABCG5                                |
| AFF4                                          | BAG3                                             | ABCG8                                |
| AFG3L2                                        | BBS2                                             | ABHD12                               |
| AGA                                           | BCS1L                                            | ABHD5                                |
| AGO2                                          | BOLA3                                            | ABL1                                 |
| AGPAT2                                        | BRAF                                             | ABO                                  |
| AGTR2                                         | BRCA2                                            | ACAD8                                |
| AHCY                                          | BRCC3                                            | ACAD9                                |
| AHDC1                                         | BRIP1                                            | ACADL                                |
| AHI1                                          | BSCL2                                            | ACADM                                |
| AIFM1                                         | CALR3                                            | ACADS                                |
| AIMP1                                         | CAP2                                             | ACADSB                               |
| AIMP2                                         | CASQ1                                            | ACADVL                               |
| AK1                                           | CAV1                                             | ACAN                                 |
| AKT3                                          | CAV3                                             | ACAT1                                |
| ALDH18A1                                      | CAVIN4                                           | ACBD5                                |

|          |         |          |
|----------|---------|----------|
| ALDH3A2  | CDKN1C  | ACE      |
| ALDH4A1  | CHKB    | ACHE     |
| ALDH5A1  | CHRM2   | ACKR1    |
| ALDH7A1  | CISD2   | ACO2     |
| ALG1     | COA5    | ACOX1    |
| ALG11    | COA6    | ACOX2    |
| ALG12    | COG7    | ACP33    |
| ALG13    | COL7A1  | ACP4     |
| ALG2     | COQ2    | ACP5     |
| ALG3     | COQ4    | ACSF3    |
| ALG6     | COX10   | ACSL4    |
| ALG8     | COX14   | ACSL6    |
| ALG9     | COX20   | ACTA1    |
| ALMS1    | COX6B1  | ACTA2    |
| ALX1     | COX7B   | ACTB     |
| ALX4     | CPT1A   | ACTC1    |
| AMER1    | CPT2    | ACTG1    |
| AMMECR1  | CRYAB   | ACTG2    |
| AMN      | CSRP3   | ACTL6A   |
| AMPD2    | CTNNA3  | ACTN1    |
| AMT      | D2HGDH  | ACTN2    |
| ANK3     | DCAF8   | ACTN3    |
| ANKH     | DCHS1   | ACTN4    |
| ANKLE2   | DES     | ACVR1    |
| ANKRD11  | DLD     | ACVR1B   |
| ANO10    | DMD     | ACVR2B   |
| ANTXR1   | DMPK    | ACVRL1   |
| AP1S1    | DNAJC19 | ACY1     |
| AP1S2    | DOLK    | ADA      |
| AP3B1    | DPM3    | ADA2     |
| AP3B2    | DSC2    | ADAM10   |
| AP3D1    | DSG2    | ADAM17   |
| AP4B1    | DSP     | ADAM22   |
| AP4E1    | DTNA    | ADAM9    |
| AP4M1    | DYSF    | ADAMTS10 |
| AP4S1    | ELAC2   | ADAMTS13 |
| AP5Z1    | EMD     | ADAMTS17 |
| APC2     | ENPP1   | ADAMTS18 |
| APOPT1   | EPG5    | ADAMTS2  |
| APTX     | ERBB3   | ADAMTS3  |
| ARCN1    | ERCC4   | ADAMTS5  |
| ARFGEF2  | EYA4    | ADAMTSL2 |
| ARG1     | FAH     | ADAMTSL4 |
| ARHGAP31 | FANCA   | ADAR     |
| ARHGEF6  | FANCB   | ADAT3    |
| ARHGEF9  | FANCC   | ADCY1    |
| ARID1A   | FANCD2  | ADCY10   |
| ARID1B   | FANCE   | ADCY5    |

|          |         |        |
|----------|---------|--------|
| ARID2    | FANCF   | ADCY6  |
| ARL13B   | FANCG   | ADD1   |
| ARL6     | FANCI   | ADD3   |
| ARMC9    | FANCL   | ADGRE2 |
| ARSA     | FANCM   | ADGRG1 |
| ARSE     | FASTKD2 | ADGRG2 |
| ARV1     | FBN1    | ADGRG6 |
| ARX      | FBXL4   | ADGRV1 |
| ASAH1    | FHL1    | ADH1B  |
| ASCL1    | FHL2    | ADH1C  |
| ASH1L    | FIG4    | ADIPOQ |
| ASL      | FKRP    | ADK    |
| ASNS     | FKTN    | ADNP   |
| ASPA     | FLNA    | ADRA2B |
| ASPM     | FLNC    | ADRA2C |
| ASS1     | FOS     | ADRB1  |
| ASXL1    | FOXD4   | ADRB2  |
| ASXL2    | FOXRED1 | ADRB3  |
| ASXL3    | FTO     | ADSL   |
| ATAD1    | FXN     | ADSSL1 |
| ATAD3A   | GAA     | AF10   |
| ATCAY    | GATA4   | AFF2   |
| ATIC     | GATAD1  | AFF4   |
| ATL1     | GATB    | AFG3L2 |
| ATN1     | GATC    | AFP    |
| ATP1A1   | GBE1    | AGA    |
| ATP1A2   | GJA5    | AGBL1  |
| ATP1A3   | GLA     | AGBL5  |
| ATP2A2   | GLB1    | AGK    |
| ATP6AP2  | GMPPB   | AGL    |
| ATP6V0A2 | GNAS    | AGO2   |
| ATP6V1A  | GNPTAB  | AGPAT2 |
| ATP6V1B2 | GNS     | AGPS   |
| ATP7A    | GPC3    | AGRN   |
| ATP7B    | GPR101  | AGRP   |
| ATP8A2   | GSN     | AGT    |
| ATPAF2   | GTPBP3  | AGTR1  |
| ATR      | GYS1    | AGTR2  |
| ATRX     | HADH    | AGXT   |
| AUH      | HADHA   | AHCY   |
| AUTS2    | HADHB   | AHDC1  |
| AVPR2    | HAMP    | AHI1   |
| B3GALNT2 | HBB     | AHNAK  |
| B3GALT6  | HCCS    | AHSP   |
| B3GLCT   | HCN4    | AICDA  |
| B4GALNT1 | HFE     | AIFM1  |
| B4GALT1  | HGSNAT  | AIMP1  |
| B4GALT7  | HJV     | AIMP2  |

|          |          |          |
|----------|----------|----------|
| B4GAT1   | HPS1     | AIPL1    |
| BBS1     | HRAS     | AIRE     |
| BBS10    | HSD17B10 | AK1      |
| BBS12    | HSPB6    | AK2      |
| BBS2     | IDH2     | AKAP10   |
| BBS4     | IDUA     | AKAP9    |
| BBS5     | IGF2     | AKR1C2   |
| BBS7     | ILK      | AKR1C4   |
| BBS9     | ISL1     | AKR1D1   |
| BCAP31   | ITGB1BP2 | AKT1     |
| BCKDHA   | JPH2     | AKT2     |
| BCKDHB   | JUP      | AKT3     |
| BCKDK    | KCNH1    | ALAD     |
| BCL11A   | KCNH2    | ALAS2    |
| BCL11B   | KIF20A   | ALB      |
| BCOR     | KLF1     | ALDH18A1 |
| BCORL1   | KRAS     | ALDH1A2  |
| BCS1L    | LAMA4    | ALDH1A3  |
| BLM      | LAMP2    | ALDH1B1  |
| BOLA3    | LDB3     | ALDH2    |
| BPTF     | LEMD2    | ALDH3A2  |
| BRAF     | LIAS     | ALDH4A1  |
| BRAT1    | LMNA     | ALDH5A1  |
| BRD4     | MAP2K1   | ALDH6A1  |
| BRF1     | MAP2K2   | ALDH7A1  |
| BRPF1    | MGME1    | ALDOA    |
| BRSK2    | MIB1     | ALDOB    |
| BRWD3    | MLYCD    | ALG1     |
| BSCL2    | MMUT     | ALG10    |
| BTD      | MRPL3    | ALG11    |
| BUB1B    | MRPL44   | ALG12    |
| C12orf4  | MRPS22   | ALG13    |
| C12orf57 | MTCP1    | ALG14    |
| C12orf65 | MTO1     | ALG2     |
| C2CD3    | MYBPC3   | ALG3     |
| CA2      | MYH6     | ALG6     |
| CA5A     | MYH7     | ALG8     |
| CA8      | MYL2     | ALG9     |
| CACNA1A  | MYL3     | ALMS1    |
| CACNA1C  | MYLK2    | ALOX12B  |
| CACNA1D  | MYOT     | ALOX5    |
| CACNA1E  | MYOZ1    | ALOX5AP  |
| CACNA1G  | MYOZ2    | ALOXE3   |
| CACNA2D1 | MYPN     | ALPI     |
| CACNG2   | NAGA     | ALPK3    |
| CAD      | NAGLU    | ALPL     |
| CAMK2A   | NDUFA1   | ALS2     |
| CAMK2B   | NDUFA11  | ALS2CL   |

|          |         |         |
|----------|---------|---------|
| CAMTA1   | NDUFAF1 | ALX1    |
| CANT1    | NDUFAF2 | ALX3    |
| CAPN10   | NDUFAF3 | ALX4    |
| CARS2    | NDUFAF4 | AMACR   |
| CASK     | NDUFAF5 | AMBN    |
| CBL      | NDUFB11 | AMELX   |
| CBLIF    | NDUFB3  | AMER1   |
| CBS      | NDUFB9  | AMH     |
| CC2D1A   | NDUFS1  | AMHR2   |
| CC2D2A   | NDUFS2  | AMMECR1 |
| CCBE1    | NDUFS3  | AMN     |
| CCDC115  | NDUFS4  | AMPD1   |
| CCDC174  | NDUFS6  | AMPD2   |
| CCDC22   | NDUFV1  | AMPD3   |
| CCDC78   | NDUFV2  | AMT     |
| CCDC88A  | NEBL    | ANG     |
| CCDC88C  | NEU1    | ANGPT1  |
| CCND2    | NEXN    | ANGPTL3 |
| CCNK     | NF1     | ANGPTL4 |
| CDC42    | NKX2-5  | ANK1    |
| CDC6     | NONO    | ANK2    |
| CDH11    | NPPA    | ANK3    |
| CDH15    | NRAS    | ANKH    |
| CDK10    | NSD1    | ANKK1   |
| CDK13    | NUBPL   | ANKLE2  |
| CDK5RAP2 | PALB2   | ANKRD1  |
| CDK8     | PCCA    | ANKRD11 |
| CDKL5    | PCCB    | ANKRD26 |
| CDKN1C   | PDGFRA  | ANKS3   |
| CDON     | PDLIM3  | ANKS6   |
| CENPF    | PET100  | ANKZF1  |
| CENPJ    | PEX1    | ANLN    |
| CEP104   | PEX10   | ANO10   |
| CEP120   | PEX11B  | ANO3    |
| CEP135   | PEX12   | ANO5    |
| CEP152   | PEX13   | ANO6    |
| CEP290   | PEX14   | ANOS1   |
| CEP41    | PEX16   | ANTXR1  |
| CEP57    | PEX19   | ANTXR2  |
| CEP83    | PEX2    | ANXA5   |
| CEP89    | PEX26   | AP1S1   |
| CHAMP1   | PEX3    | AP1S2   |
| CHD1     | PEX5    | AP1S3   |
| CHD2     | PEX6    | AP2S1   |
| CHD3     | PEX7    | AP3B1   |
| CHD4     | PGM1    | AP3B2   |
| CHD7     | PHYH    | AP3D1   |
| CHD8     | PIGT    | AP4B1   |

|          |          |          |
|----------|----------|----------|
| CHKB     | PKP2     | AP4E1    |
| CHMP1A   | PLEC     | AP4M1    |
| CHRNA4   | PLEKHM2  | AP4S1    |
| CIC      | PLN      | AP5Z1    |
| CIT      | PMM2     | APC2     |
| CKAP2L   | PNPLA2   | APCDD1   |
| CLCN4    | POLG     | APOA1    |
| CLCNKB   | POMT1    | APOA2    |
| CLIC2    | POU1F1   | APOA5    |
| CLIP1    | PPARG    | APOB     |
| CLN3     | PPCS     | APOC2    |
| CLN5     | PRDM16   | APOC3    |
| CLN6     | PRKAG2   | APOL1    |
| CLN8     | PRPS1    | APOPT1   |
| CLP1     | PSEN1    | APPL1    |
| CLPB     | PSEN2    | APRT     |
| CLTC     | PTPN11   | APTX     |
| CNKS2R2  | QRSL1    | AQP1     |
| CNNM2    | RAB3GAP2 | AQP2     |
| CNOT1    | RAD51C   | AQP3     |
| CNOT3    | RAF1     | AQP5     |
| CNPY3    | RBCK1    | AQP7     |
| CNTNAP2  | RBM20    | ARCN1    |
| COASY    | RET      | ARFGEF2  |
| COG1     | RIT1     | ARG1     |
| COG4     | RMND1    | ARHGAP26 |
| COG5     | RYR2     | ARHGAP31 |
| COG6     | SCARB2   | ARHGDIA  |
| COG7     | SCN5A    | ARHGEF1  |
| COG8     | SCO1     | ARHGEF10 |
| COL4A1   | SCO2     | ARHGEF2  |
| COL4A2   | SDHA     | ARHGEF6  |
| COL4A3BP | SDHAF1   | ARHGEF9  |
| COLEC11  | SDHD     | ARID1A   |
| COQ2     | SELENON  | ARID1B   |
| COQ4     | SGCA     | ARID2    |
| COQ8A    | SGCB     | ARL13B   |
| COQ9     | SGCD     | ARL2BP   |
| COX10    | SGSH     | ARL3     |
| COX15    | SHOC2    | ARL6     |
| COX6B1   | SKI      | ARL6IP1  |
| CP       | SLC19A2  | ARMC4    |
| CPLANE1  | SLC22A5  | ARMC5    |
| CPLX1    | SLC25A20 | ARMC9    |
| CPS1     | SLC25A3  | ARNT2    |
| CRADD    | SLC25A4  | ARPC1B   |
| CRBN     | SLC2A10  | ARSA     |
| CREBBP   | SLX4     | ARSB     |

|         |          |         |
|---------|----------|---------|
| CRLF1   | SNAP29   | ARSE    |
| CSNK2A1 | SOD2     | ART4    |
| CSNK2B  | SOS1     | ARV1    |
| CSPP1   | SPEG     | ARX     |
| CSTB    | SYNE1    | ASAH1   |
| CTBP1   | SYNE2    | ASB10   |
| CTCF    | TACO1    | ASCC1   |
| CTDP1   | TAZ      | ASCL1   |
| CTNNA2  | TBX20    | ASH1L   |
| CTNNB1  | TCAP     | ASIP    |
| CTNND1  | TEAD1    | ASL     |
| CTNND2  | TERT     | ASNA1   |
| CTSA    | TGFB1    | ASNS    |
| CTSD    | TGFB3    | ASPA    |
| CTTNBP2 | TIMM50   | ASPH    |
| CUBN    | TMEM126A | ASPM    |
| CUL4B   | TMEM43   | ASPN    |
| CUX1    | TMEM70   | ASPSCR1 |
| CUX2    | TMPO     | ASS1    |
| CWC27   | TNNC1    | ASXL1   |
| CWF19L1 | TNNI3    | ASXL2   |
| CXorf56 | TNNI3K   | ASXL3   |
| CYB5R3  | TNNT2    | ATAD1   |
| CYP27A1 | TPI1     | ATAD3A  |
| CYP2U1  | TPM1     | ATAD3B  |
| D2HGDH  | TPM3     | ATCAY   |
| DAG1    | TRNT1    | ATF6    |
| DARS    | TSFM     | ATG16L1 |
| DARS2   | TTN      | ATIC    |
| DBT     | TTPA     | ATL1    |
| DCAF17  | TTR      | ATL3    |
| DCC     | TUFM     | ATM     |
| DCHS1   | TWNK     | ATN1    |
| DCPS    | TXNRD2   | ATOH7   |
| DCX     | UBE2T    | ATP13A2 |
| DDC     | UBR1     | ATP1A1  |
| DDHD2   | VCL      | ATP1A2  |
| DDX11   | VPS13A   | ATP1A3  |
| DDX3X   | WFS1     | ATP2A1  |
| DDX59   | XK       | ATP2A2  |
| DEAF1   | XPNPEP3  | ATP2B2  |
| DENND5A | YARS2    | ATP2B3  |
| DEPDC5  |          | ATP2C1  |
| DHCR24  |          | ATP5F1A |
| DHCR7   |          | ATP5F1B |
| DHDDS   |          | ATP5F1C |
| DHFR    |          | ATP5F1D |
| DHTKD1  |          | ATP5F1E |

DHX30  
DIAPH1  
DIP2B  
DIS3L2  
DKC1  
DLAT  
DLD  
DLG3  
DLG4  
DMD  
DMPK  
DNAJC12  
DNAJC19  
DNM1  
DNMT3A  
DNMT3B  
DOCK6  
DOCK7  
DOCK8  
DOLK  
DONSON  
DPAGT1  
DPF2  
DPH1  
DPM1  
DPP6  
DPYD  
DPYS  
DST  
DYM  
DYNC1H1  
DYRK1A  
EBF3  
EBP  
ECHS1  
EDC3  
EED  
EEF1A2  
EFNB2  
EFTUD2  
EHMT1  
EIF2AK3  
EIF2S3  
EIF3F  
EIF4A3  
EIF4G1  
ELAC2  
ELOVL4

ATP5IF1  
ATP5MC1  
ATP5MC2  
ATP5MC3  
ATP5ME  
ATP5MF  
ATP5MG  
ATP5MGL  
ATP5PB  
ATP5PD  
ATP5PF  
ATP5PO  
ATP6AP1  
ATP6AP2  
ATP6V0A2  
ATP6V0A4  
ATP6V1A  
ATP6V1B1  
ATP6V1B2  
ATP7A  
ATP7B  
ATP8A2  
ATP8B1  
ATPAF1  
ATPAF2  
ATR  
ATRX  
ATXN1  
ATXN10  
ATXN2  
ATXN3  
ATXN7  
ATXN8OS  
AUH  
AURKA  
AURKC  
AUTS2  
AVP  
AVPR2  
AXIN1  
AXL  
B2M  
B3GALNT1  
B3GALNT2  
B3GALT6  
B3GAT3  
B3GLCT  
B4GALNT1



ELP2  
EMC1  
EML1  
EMX2  
ENTPD1  
EP300  
EPB41L1  
EPG5  
ERCC1  
ERCC2  
ERCC3  
ERCC5  
ERCC6  
ERCC8  
ERLIN2  
ESCO2  
ETFA  
ETFB  
ETFDH  
ETHE1  
EXOC8  
EXOSC2  
EXOSC3  
EXOSC9  
EXTL3  
EZH2  
FA2H  
FAM126A  
FAM20C  
FANCD2  
FAR1  
FARSB  
FAT4  
FBN1  
FBXL3  
FBXL4  
FBXO11  
FBXO31  
FGD1  
FGF12  
FGF14  
FGFR1  
FGFR2  
FGFR3  
FH  
FIBP  
FIGN  
FKRP

B4GALT1  
B4GALT7  
B4GAT1  
B9D1  
B9D2  
BAAT  
BACH2  
BAG3  
BANF1  
BARD1  
BAX  
BBIP1  
BBS1  
BBS10  
BBS12  
BBS2  
BBS4  
BBS5  
BBS7  
BBS9  
BCAM  
BCAP31  
BCHE  
BCKDHA  
BCKDHB  
BCKDK  
BCL10  
BCL11A  
BCL11B  
BCL2  
BCL7A  
BCL9  
BCO1  
BCOR  
BCORL1  
BCR  
BCS1L  
BDNF  
BEAN1  
BEST1  
BFSP1  
BFSP2  
BGN  
BHLHA9  
BHLHE41  
BICC1  
BICD2  
BIN1

FKTN  
FLNA  
FLVCR1  
FLVCR2  
FMN2  
FMR1  
FOLR1  
FOXG1  
FOXP1  
FOXP2  
FOXRED1  
FRAS1  
FREM2  
FRMD4A  
FRMPD4  
FRRS1L  
FTCD  
FTO  
FTSJ1  
FUCA1  
FUT8  
GABBR2  
GABRA1  
GABRA3  
GABRB1  
GABRB2  
GABRB3  
GABRG2  
GAD1  
GALC  
GALE  
GALT  
GAMT  
GATAD2B  
GATM  
GBA  
GCDH  
GCH1  
GCSH  
GDI1  
GFAP  
GFM1  
GFM2  
GJA1  
GJB1  
GJC2  
GK  
GLB1

BLK  
BLM  
BLNK  
BLOC1S3  
BLOC1S6  
BLVRA  
BMP1  
BMP15  
BMP2  
BMP4  
BMPER  
BMPR1B  
BMPR2  
BMS1  
BNC2  
BOLA1  
BOLA2  
BOLA3  
BPGM  
BPTF  
BRAF  
BRAT1  
BRCA2  
BRCC3  
BRD4  
BRF1  
BRPF1  
BRSK2  
BRWD3  
BSCL2  
BSG  
BSND  
BTD  
BTK  
BTLA  
BTNL2  
BUB1  
BUB1B  
BVES  
C12orf4  
C12orf57  
C12orf65  
C15orf41  
C19orf12  
C1GALT1C1  
C1QA  
C1QB  
C1QBP

GLDC  
GLI2  
GLI3  
GLIS3  
GLUD1  
GLYCK  
GM2A  
GMPPA  
GMPPB  
GNAO1  
GNAS  
GNB1  
GNB5  
GNPAT  
GNPTAB  
GNPTG  
GNS  
GPAA1  
GPC3  
GPHN  
GPSM2  
GPT2  
GRIA3  
GRIA4  
GRID2  
GRIK2  
GRIN1  
GRIN2A  
GRIN2B  
GRIN2D  
GRIN3B  
GRIP1  
GRM1  
GRN  
GSE1  
GSS  
GTF2H5  
GTPBP2  
GTPBP3  
GUSB  
HACE1  
HADH  
HADHA  
HAX1  
HCCS  
HCFC1  
HCN1  
HDAC4

C1QC  
C1QTNF5  
C1R  
C1S  
C2  
C2CD3  
C3  
C4A  
C4B  
C5  
C6  
C7  
C8A  
C8B  
C8G  
C8orf37  
C9  
C9orf72  
CA12  
CA2  
CA4  
CA5A  
CA8  
CABP2  
CABP4  
CACNA1A  
CACNA1B  
CACNA1C  
CACNA1D  
CACNA1E  
CACNA1F  
CACNA1G  
CACNA1H  
CACNA1S  
CACNA2D1  
CACNA2D2  
CACNA2D4  
CACNB2  
CACNB4  
CACNG2  
CAD  
CALCR  
CALM1  
CALM2  
CALM3  
CALR  
CALR3  
CAMK2A

HDAC6  
HDAC8  
HECTD1  
HECW2  
HEPACAM  
HERC1  
HERC2  
HESX1  
HEXA  
HEXB  
HGSNAT  
HIBCH  
HIST1H1E  
HIST1H4C  
HIVEP2  
HLCS  
HMGCL  
HMGCS2  
HNMT  
HNRNPH2  
HNRNPK  
HNRNPU  
HOXA1  
HPD  
HPRT1  
HRAS  
HSD17B10  
HSD17B4  
HSPA9  
HSPD1  
HTRA2  
HUWE1  
HYLS1  
IARS  
IARS2  
IDS  
IDUA  
IER3IP1  
IFIH1  
IFT172  
IFT81  
IGBP1  
IGF1  
IGF1R  
IKBK  
IL1RAPL1  
IMPA1  
INPP5E

CAMK2B  
CAMTA1  
CANT1  
CAP2  
CAPN1  
CAPN10  
CAPN12  
CAPN3  
CAPN5  
CARD11  
CARD14  
CARD9  
CARMIL2  
CARS2  
CARTPT  
CASK  
CASP10  
CASP12  
CASP14  
CASP8  
CASQ1  
CASQ2  
CASR  
CAST  
CAT  
CATSPER1  
CAV1  
CAV3  
CAVIN1  
CAVIN4  
CBL  
CBLIF  
CBS  
CBX2  
CC2D1A  
CC2D2A  
CCBE1  
CCDC103  
CCDC114  
CCDC115  
CCDC137  
CCDC14  
CCDC151  
CCDC174  
CCDC22  
CCDC28B  
CCDC39  
CCDC40

|           |         |
|-----------|---------|
| INPP5K    | CCDC50  |
| IQSEC2    | CCDC65  |
| IRF2BPL   | CCDC78  |
| ISCA2     | CCDC8   |
| ISPD      | CCDC88A |
| ITGA7     | CCDC88C |
| ITPA      | CCL11   |
| ITPR1     | CCL2    |
| IVD       | CCL3L1  |
| JAG1      | CCL5    |
| JAM3      | CCM2    |
| JMJD1C    | CCN6    |
| KALRN     | CCND1   |
| KANK1     | CCND2   |
| KANSL1    | CCNK    |
| KAT6A     | CCNO    |
| KAT6B     | CCNQ    |
| KATNB1    | CCR2    |
| KCNA2     | CCR5    |
| KCNA4     | CCT5    |
| KCNB1     | CD151   |
| KCNC1     | CD164   |
| KCNC3     | CD19    |
| KCNH1     | CD207   |
| KCNJ10    | CD209   |
| KCNJ11    | CD244   |
| KCNJ6     | CD247   |
| KCNK9     | CD27    |
| KCNQ2     | CD2AP   |
| KCNQ3     | CD320   |
| KCNQ5     | CD36    |
| KCNT1     | CD3D    |
| KCTD7     | CD3E    |
| KDM1A     | CD3G    |
| KDM5B     | CD4     |
| KDM5C     | CD40    |
| KDM6A     | CD40LG  |
| KIAA0586  | CD44    |
| KIAA1109  | CD46    |
| KIDINS220 | CD55    |
| KIF11     | CD59    |
| KIF14     | CD70    |
| KIF1A     | CD79A   |
| KIF1BP    | CD79B   |
| KIF2A     | CD81    |
| KIF4A     | CD8A    |
| KIF5C     | CD96    |
| KIF7      | CDAN1   |

KIRREL3  
KLF7  
KLHL15  
KMT2A  
KMT2B  
KMT2C  
KMT2D  
KMT5B  
KNL1  
KPTN  
KRAS  
KRBOX4  
L1CAM  
L2HGDH  
LAMA1  
LAMA2  
LAMB1  
LAMC3  
LAMP2  
LARGE1  
LARP7  
LAS1L  
LGI4  
LIAS  
LIG4  
LINGO1  
LINS1  
LMAN2L  
LMBRD1  
LONP1  
LRP2  
LRPPRC  
LZTFL1  
LZTR1  
MAB21L1  
MAB21L2  
MACF1  
MAF  
MAG  
MAGEL2  
MAGT1  
MAN1B1  
MAN2B1  
MANBA  
MAOA  
MAP1B  
MAP2K1  
MAP2K2

CDC14A  
CDC42  
CDC45  
CDC6  
CDC73  
CDCA7  
CDH11  
CDH15  
CDH23  
CDH3  
CDHR1  
CDK10  
CDK13  
CDK5  
CDK5RAP2  
CDK6  
CDK8  
CDKAL1  
CDKL5  
CDKN1A  
CDKN1C  
CDKN2B  
CDKN2C  
CDON  
CDSN  
CDT1  
CEACAM16  
CEBPE  
CEL  
CELSR2  
CENPE  
CENPF  
CENPJ  
CEP104  
CEP120  
CEP135  
CEP152  
CEP164  
CEP19  
CEP290  
CEP41  
CEP57  
CEP63  
CEP78  
CEP83  
CEP89  
CERKL  
CERS1

|          |         |
|----------|---------|
| MAPK8IP3 | CERS3   |
| MAPRE2   | CES1    |
| MASP1    | CETP    |
| MAT1A    | CFAP298 |
| MAU2     | CFAP53  |
| MBD5     | CFAP57  |
| MBOAT7   | CFB     |
| MBTPS2   | CFC1    |
| MCCC1    | CFD     |
| MCCC2    | CFH     |
| MCOLN1   | CFHR1   |
| MCPH1    | CFHR2   |
| MDH2     | CFHR3   |
| MECP2    | CFHR4   |
| MECR     | CFHR5   |
| MED12    | CFI     |
| MED13    | CFL2    |
| MED13L   | CFP     |
| MED17    | CFTR    |
| MED23    | CHAMP1  |
| MED25    | CHAT    |
| MEF2C    | CHCHD10 |
| MEGF8    | CHCHD2  |
| MEIS2    | CHD1    |
| METTL23  | CHD2    |
| MFF      | CHD3    |
| MFSD2A   | CHD4    |
| MFSD8    | CHD7    |
| MGAT2    | CHD8    |
| MGP      | CHI3L1  |
| MICU1    | CHIC2   |
| MID1     | CHIT    |
| MID2     | CHIT1   |
| MKKS     | CHKB    |
| MKS1     | CHM     |
| MLC1     | CHMP1A  |
| MLYCD    | CHMP2B  |
| MMAA     | CHMP4B  |
| MMAB     | CHN1    |
| MMACHC   | CHRDL1  |
| MMADHC   | CHRM2   |
| MMUT     | CHRM3   |
| MOCS1    | CHRNA1  |
| MOCS2    | CHRNA2  |
| MOGS     | CHRNA3  |
| MPDU1    | CHRNA4  |
| MPDZ     | CHRNA5  |
| MPLKIP   | CHRNB1  |

MRPL3  
MRPS22  
MSL3  
MSMO1  
MTFMT  
MTHFR  
MTOR  
MTR  
MTRR  
MVK  
MYCN  
MYH9  
MYO5A  
MYT1L  
NAA10  
NAA15  
NACC1  
NAGA  
NAGLU  
NAGS  
NALCN  
NANS  
NARS2  
NBEA  
NBN  
NDE1  
NDP  
NDST1  
NDUFA1  
NDUFA11  
NDUFA12  
NDUFA2  
NDUFAF3  
NDUFAF5  
NDUFS1  
NDUFS2  
NDUFS3  
NDUFS4  
NDUFS6  
NDUFS7  
NDUFS8  
NDUFV1  
NDUFV2  
NECAP1  
NECTIN1  
NEDD4L  
NEU1  
NEXMIF

CHRN2  
CHRND  
CHRNE  
CHRNA  
CHST14  
CHST3  
CHST6  
CHST8  
CHSY1  
CHUK  
CIB2  
CIC  
CIDEA  
CITA  
CILP  
CISD2  
CISH  
CIT  
CITED2  
CIZ1  
CKAP2L  
CLCF1  
CLCN1  
CLCN2  
CLCN4  
CLCN5  
CLCN7  
CLCNKA  
CLCNKB  
CLDN1  
CLDN10  
CLDN14  
CLDN16  
CLDN19  
CLEC4D  
CLEC7A  
CLIC2  
CLIC5  
CLIP1  
CLMP  
CLN3  
CLN5  
CLN6  
CLN8  
CLP1  
CLPB  
CLPP  
CLR1



NF1  
NFATC1  
NFE2L2  
NFIA  
NFI  
NFU1  
NGLY1  
NHS  
NIPBL  
NKX2-1  
NLGN3  
NLGN4X  
NLRP3  
NONO  
NPC1  
NPC2  
NPHP1  
NR2F1  
NR4A2  
NR5A1  
NRAS  
NRXN1  
NSD1  
NSD2  
NSDHL  
NSUN2  
NT5C2  
NT5C3A  
NTRK1  
NTRK2  
NUBPL  
NUP62  
NUS1  
OAT  
OCLN  
OCRL  
ODC1  
OFD1  
OGT  
OPHN1  
ORC1  
OSGEP  
OTC  
OTUD6B  
OTX2  
OXCT1  
P4HTM  
PACS1

CLTC  
CNBP  
CNGA1  
CNGA3  
CNGB1  
CNGB3  
CNKSR2  
CNNM2  
CNNM4  
CNOT1  
CNOT3  
CNPY3  
CNTN1  
CNTN2  
CNTNAP1  
CNTNAP2  
COA1  
COA3  
COA5  
COA6  
COA7  
COASY  
COCH  
COG1  
COG4  
COG5  
COG6  
COG7  
COG8  
COL10A1  
COL11A1  
COL11A2  
COL12A1  
COL13A1  
COL14A1  
COL17A1  
COL18A1  
COL1A1  
COL1A2  
COL25A1  
COL27A1  
COL2A1  
COL3A1  
COL4A1  
COL4A2  
COL4A3  
COL4A3BP  
COL4A4

|          |         |
|----------|---------|
| PACS2    | COL4A5  |
| PAFAH1B1 | COL4A6  |
| PAH      | COL5A1  |
| PAK3     | COL5A2  |
| PANK2    | COL6A1  |
| PANX1    | COL6A2  |
| PARN     | COL6A3  |
| PAX1     | COL7A1  |
| PAX6     | COL8A2  |
| PAX8     | COL9A1  |
| PBX1     | COL9A2  |
| PC       | COL9A3  |
| PCBD1    | COLEC11 |
| PCCA     | COLQ    |
| PCCB     | COMP    |
| PCDH19   | COMT    |
| PCGF2    | COPA    |
| PCLO     | COQ2    |
| PCNT     | COQ4    |
| PDE4D    | COQ5    |
| PDHA1    | COQ6    |
| PDHX     | COQ7    |
| PDP1     | COQ8A   |
| PDSS1    | COQ8B   |
| PDSS2    | COQ9    |
| PEPD     | CORIN   |
| PET100   | CORO1A  |
| PEX1     | COX10   |
| PEX10    | COX14   |
| PEX11B   | COX15   |
| PEX12    | COX20   |
| PEX13    | COX4I1  |
| PEX16    | COX4I2  |
| PEX19    | COX5A   |
| PEX2     | COX5B   |
| PEX26    | COX6A1  |
| PEX3     | COX6A2  |
| PEX5     | COX6B1  |
| PEX6     | COX6B2  |
| PEX7     | COX6C   |
| PGAP1    | COX7A1  |
| PGAP2    | COX7A2  |
| PGAP3    | COX7B   |
| PGK1     | COX7B2  |
| PGM3     | COX7C   |
| PHF21A   | COX8A   |
| PHF6     | COX8C   |
| PHF8     | CP      |

PHGDH  
PHIP  
PI4KA  
PIGA  
PIGC  
PIGG  
PIGL  
PIGN  
PIGO  
PIGT  
PIGV  
PIGW  
PIGY  
PIK3CA  
PIK3R2  
PLA2G6  
PLAA  
PLCB1  
PLK4  
PLP1  
PLPBP  
PLXND1  
PMM2  
PMPCA  
PMPCB  
PNKP  
PNP  
PNPLA6  
POC1A  
POGZ  
POLG  
POLR3A  
POLR3B  
POMGNT1  
POMGNT2  
POMK  
POMT1  
POMT2  
PORCN  
POU1F1  
POU3F3  
PPM1D  
PPOX  
PPP1CB  
PPP1R15B  
PPP2CA  
PPP2R1A  
PPP2R5B

CPA6  
CPAMD8  
CPLANE1  
CPLX1  
CPN1  
CPOX  
CPS1  
CPT1A  
CPT1C  
CPT2  
CPZ  
CR1  
CR2  
CRADD  
CRB1  
CRB2  
CRBN  
CREB1  
CREB3L1  
CREBBP  
CRELD1  
CRIPT  
CRLF1  
CRTAP  
CRTC1  
CRX  
CRYAA  
CRYAB  
CRYBA1  
CRYBA2  
CRYBA4  
CRYBB1  
CRYBB2  
CRYBB3  
CRYGB  
CRYGC  
CRYGD  
CRYGS  
CRYM  
CSF1R  
CSF2RA  
CSF2RB  
CSF3R  
CSMF  
CSNK1D  
CSNK2A1  
CSNK2B  
CSPP1

PPP2R5C  
PPP2R5D  
PPP3CA  
PPT1  
PQBP1  
PRF1  
PRKAR1A  
PRMT7  
PRODH  
PRPS1  
PRR12  
PRRT2  
PRSS12  
PRUNE1  
PSAP  
PSAT1  
PSEN1  
PSMD12  
PSPH  
PTCH1  
PTCHD1  
PTDSS1  
PTEN  
PTF1A  
PTPN11  
PTRH2  
PTRHD1  
PTS  
PUF60  
PUM1  
PURA  
PUS1  
PUS3  
PUS7  
PYCR1  
PYCR2  
QARS  
QDPR  
QRICH1  
RAB11B  
RAB18  
RAB23  
RAB27A  
RAB39B  
RAB3GAP1  
RAB3GAP2  
RAB40AL  
RAC1

CSRP3  
CST3  
CSTA  
CSTB  
CTBP1  
CTC1  
CTCF  
CTDP1  
CTF1  
CTH  
CTLA4  
CTNNA2  
CTNNA3  
CTNNB1  
CTNND1  
CTNND2  
CTNS  
CTPS1  
CTRC  
CTSA  
CTSC  
CTSD  
CTSF  
CTSK  
CTTNBP2  
CUBN  
CUL3  
CUL4B  
CUL7  
CUX1  
CUX2  
CWC27  
CWF19L1  
CX3CR1  
CXCL12  
CXCR1  
CXCR4  
CXorf56  
CYB5A  
CYB5R3  
CYBA  
CYBB  
CYBC1  
CYC1  
CYCS  
CYLD  
CYP11A1  
CYP11B1

|          |         |
|----------|---------|
| RAD21    | CYP11B2 |
| RAF1     | CYP17A1 |
| RAI1     | CYP19A1 |
| RALA     | CYP1A2  |
| RARB     | CYP1B1  |
| RARS2    | CYP21A2 |
| RBBP8    | CYP24A1 |
| RBFOX1   | CYP26B1 |
| RBM10    | CYP26C1 |
| RBM28    | CYP27A1 |
| RBPJ     | CYP27B1 |
| RCBTB1   | CYP2A6  |
| RECQL4   | CYP2B6  |
| RELN     | CYP2C   |
| RERE     | CYP2C19 |
| REV3L    | CYP2C8  |
| RFT1     | CYP2C9  |
| RHEB     | CYP2D6  |
| RHOBTB2  | CYP2R1  |
| RIT1     | CYP2U1  |
| RLIM     | CYP3A4  |
| RMND1    | CYP3A5  |
| RNASEH2A | CYP4F2  |
| RNASEH2B | CYP4F22 |
| RNASEH2C | CYP4V2  |
| RNASET2  | CYP7A1  |
| RNF113A  | CYP7B1  |
| RNF125   | CYTB    |
| ROGDI    | D2HGDH  |
| ROR2     | DAG1    |
| RORA     | DAND5   |
| RPGRIP1L | DAPK3   |
| RPL10    | DARS    |
| RPS19    | DARS2   |
| RPS6KA3  | DAX1    |
| RRM2B    | DAZL    |
| RSPRY1   | DBET    |
| RSRC1    | DBH     |
| RTEL1    | DBT     |
| RTN4IP1  | DCAF17  |
| RTTN     | DCAF8   |
| RUBCN    | DCC     |
| RUSC2    | DCDC2   |
| RXYLT1   | DCHS1   |
| SALL1    | DCLRE1B |
| SAMD9    | DCLRE1C |
| SAMHD1   | DCN     |
| SARS     | DCPS    |

SATB2  
SBDS  
SC5D  
SCAPER  
SCN1A  
SCN1B  
SCN2A  
SCN3A  
SCN8A  
SCO1  
SCO2  
SCYL1  
SDCCAG8  
SDHA  
SEMA3E  
SEPSECS  
SERAC1  
SET  
SETBP1  
SETD1A  
SETD1B  
SETD2  
SETD5  
SF1  
SGPL1  
SGSH  
SHANK2  
SHANK3  
SHH  
SHOC2  
SHROOM4  
SIK1  
SIL1  
SIN3A  
SIX3  
SKI  
SLC12A5  
SLC12A6  
SLC13A5  
SLC16A2  
SLC17A5  
SLC19A3  
SLC1A1  
SLC1A2  
SLC1A4  
SLC25A1  
SLC25A12  
SLC25A13

DCTN1  
DCX  
DCXR  
DDB2  
DDC  
DDHD1  
DDHD2  
DDOST  
DDR2  
DDX11  
DDX3X  
DDX41  
DDX58  
DDX59  
DEAF1  
DECR1  
DENND5A  
DEPDC5  
DES  
DGAT1  
DGCR2  
DGKE  
DGUOK  
DHCR24  
DHCR7  
DHDDS  
DHFR  
DHH  
DHODH  
DHTKD1  
DHX30  
DIABLO  
DIAPH1  
DIAPH2  
DIAPH3  
DIP2B  
DIS3L2  
DISC1  
DJ1  
DKC1  
DLAT  
DLC1  
DLD  
DLG3  
DLG4  
DLL1  
DLL3  
DLL4

|          |          |
|----------|----------|
| SLC25A15 | DLST     |
| SLC25A22 | DLX3     |
| SLC25A24 | DLX4     |
| SLC2A1   | DLX5     |
| SLC33A1  | DMAC1    |
| SLC35A1  | DMAC2    |
| SLC35A2  | DMAC2L   |
| SLC35A3  | DMD      |
| SLC35C1  | DMGDH    |
| SLC39A12 | DMP1     |
| SLC39A14 | DMPK     |
| SLC39A8  | DMXL2    |
| SLC46A1  | DNA2     |
| SLC4A4   | DNAAF1   |
| SLC52A2  | DNAAF2   |
| SLC6A1   | DNAAF3   |
| SLC6A17  | DNAAF4   |
| SLC6A19  | DNAAF5   |
| SLC6A3   | DNAH1    |
| SLC6A8   | DNAH11   |
| SLC6A9   | DNAH5    |
| SLC7A7   | DNAH6    |
| SLC9A6   | DNAI1    |
| SLC9A7   | DNAI2    |
| SMAD4    | DNAJB13  |
| SMAD6    | DNAJB2   |
| SMARCA1  | DNAJB6   |
| SMARCA2  | DNAJC12  |
| SMARCA4  | DNAJC13  |
| SMARCB1  | DNAJC19  |
| SMARCC2  | DNAJC21  |
| SMARCE1  | DNAJC3   |
| SMC1A    | DNAJC5   |
| SMC3     | DNAJC6   |
| SMG9     | DNAL1    |
| SMOC1    | DNAL4    |
| SMPD1    | DNASE1   |
| SMS      | DNASE1L3 |
| SNAP25   | DNM1     |
| SNAP29   | DNM1L    |
| SNIP1    | DNM2     |
| SNRPB    | DNMT1    |
| SNRPN    | DNMT3A   |
| SNX14    | DNMT3B   |
| SOBP     | DOCK2    |
| SON      | DOCK6    |
| SOS1     | DOCK7    |
| SOS2     | DOCK8    |

SOX10  
SOX11  
SOX2  
SOX3  
SOX4  
SOX5  
SPART  
SPAST  
SPATA5  
SPECC1L  
SPG11  
SPOCK1  
SPR  
SPRED1  
SPTAN1  
SPTBN2  
SRCAP  
SRD5A3  
SRPX2  
SSR4  
ST3GAL3  
ST3GAL5  
STAG1  
STAMBP  
STIL  
STRA6  
STRADA  
STT3A  
STT3B  
STX1B  
STXBP1  
SUCLA2  
SUCLG1  
SUMF1  
SUOX  
SURF1  
SUZ12  
SVBP  
SYN1  
SYNCRIP  
SYNE1  
SYNGAP1  
SYNJ1  
SYP  
SYT1  
SYT14  
SZT2  
TAF1

DOK7  
DOLK  
DONSON  
DPAGT1  
DPF2  
DPH1  
DPM1  
DPM2  
DPM3  
DPP6  
DPY19L2  
DPYD  
DPYS  
DRAM2  
DRC1  
DRD2  
DRD3  
DRD4  
DRD5  
DSC1  
DSC2  
DSC3  
DSE  
DSG1  
DSG2  
DSG3  
DSG4  
DSP  
DSPP  
DST  
DSTYK  
DTHD1  
DTNA  
DTNBP1  
DUOX2  
DUOXA2  
DUSP6  
DVL1  
DVL3  
DYM  
DYNC1H1  
DYNC2H1  
DYNC2LI1  
DYRK1A  
DYRK1B  
DYSF  
EARS2  
EBF3



|         |         |
|---------|---------|
| TAF13   | EBP     |
| TAF2    | ECE1    |
| TAF6    | ECEL1   |
| TANC2   | ECHS1   |
| TANGO2  | ECM1    |
| TAT     | ECSIT   |
| TBC1D20 | EDA     |
| TBC1D23 | EDA1    |
| TBC1D24 | EDAR    |
| TBC1D7  | EDARADD |
| TBCD    | EDC3    |
| TBCE    | EDN1    |
| TBCK    | EDN3    |
| TBL1XR1 | EDNRA   |
| TBP     | EDNRB   |
| TBR1    | EED     |
| TBX1    | EEF1A2  |
| TCF20   | EEF2    |
| TCF4    | EFEMP1  |
| TCF7L2  | EFEMP2  |
| TCN2    | EFHC1   |
| TCTN2   | EFNB1   |
| TCTN3   | EFNB2   |
| TDP2    | EFTUD2  |
| TECPR2  | EGF     |
| TECR    | EGLN1   |
| TELO2   | EGR2    |
| TFAP2A  | EHBP1   |
| TGDS    | EHHADH  |
| TGFBR1  | EHMT1   |
| TGFBR2  | EIF2AK3 |
| TGIF1   | EIF2AK4 |
| TH      | EIF2B1  |
| THOC2   | EIF2B2  |
| THOC6   | EIF2B3  |
| THRB    | EIF2B4  |
| TIMM50  | EIF2B5  |
| TIMM8A  | EIF2S3  |
| TINF2   | EIF3F   |
| TKT     | EIF4A3  |
| TLK2    | EIF4E   |
| TMCO1   | EIF4G1  |
| TMEM165 | ELAC2   |
| TMEM216 | ELANE   |
| TMEM231 | ELF4    |
| TMEM237 | ELMO2   |
| TMEM240 | ELMOD3  |
| TMEM67  | ELN     |

TMEM70  
TMLHE  
TMTC3  
TNIK  
TOE1  
TP53RK  
TPI1  
TPO  
TPP1  
TPRKB  
TRAF7  
TRAIP  
TRAPPC11  
TRAPPC6B  
TRAPPC9  
TREX1  
TRIM32  
TRIO  
TRIP12  
TRIP4  
TRIT1  
TRMT1  
TRMT10A  
TRNT1  
TRRAP  
TSC1  
TSC2  
TSEN15  
TSEN2  
TSEN54  
TSFM  
TSHB  
TSPAN7  
TTC19  
TTC37  
TTC8  
TTI2  
TUBA1A  
TUBA8  
TUBB  
TUBB2A  
TUBB2B  
TUBB3  
TUBB4A  
TUBG1  
TUBGCP4  
TUBGCP6  
TUSC3

ELOVL4  
ELOVL5  
ELP1  
ELP2  
ELP4  
EMC1  
EMD  
EMG1  
EML1  
EMP2  
EMX2  
ENAM  
ENG  
ENO3  
ENPP1  
ENTPD1  
EOGT  
EP300  
EPAS1  
EPB41  
EPB41L1  
EPB42  
EPCAM  
EPG5  
EPHA2  
EPHB2  
EPHB4  
EPHX1  
EPHX2  
EPM2A  
EPO  
EPOR  
EPS8  
EPX  
ERAL1  
ERBB2  
ERBB3  
ERBB4  
ERCC1  
ERCC2  
ERCC3  
ERCC4  
ERCC5  
ERCC6  
ERCC6L2  
ERCC8  
ERF  
ERLIN1

TWIST1  
TWNK  
UBA5  
UBE2A  
UBE3A  
UBE3B  
UBR1  
UBTF  
UFC1  
UFM1  
UNC13A  
UNC80  
UPB1  
UPF3B  
UQCRQ  
UROC1  
USP27X  
USP7  
USP9X  
VAMP1  
VAMP2  
VLDLR  
VPS11  
VPS13B  
VPS37A  
VPS53  
VRK1  
VWA3B  
WAC  
WARS2  
WASF1  
WASHC4  
WDPCP  
WDR13  
WDR19  
WDR26  
WDR4  
WDR45  
WDR45B  
WDR62  
WDR73  
WDR81  
WFS1  
WVOX  
XPA  
XPNPEP3  
XRCC4  
XYLT1

ERLIN2  
ERMAP  
ERMARD  
ESAM  
ESCO2  
ESPN  
ESR1  
ESRRB  
ETFA  
ETFB  
ETFDH  
ETHE1  
ETV6  
EVC  
EVC2  
EWSR1  
EXOC8  
EXOSC2  
EXOSC3  
EXOSC8  
EXOSC9  
EXPH5  
EXT1  
EXT2  
EXTL3  
EYA1  
EYA4  
EYS  
EZH2  
F10  
F11  
F12  
F13A1  
F13B  
F2  
F5  
F7  
F8  
F9  
FA2H  
FAAH  
FAAH2  
FAAP24  
FAAP95  
FADD  
FAH  
FAM111A  
FAM111B

XYLT2  
YAP1  
YME1L1  
YWHAE  
YWHAG  
YY1  
ZBTB11  
ZBTB16  
ZBTB18  
ZBTB20  
ZBTB24  
ZC3H14  
ZC4H2  
ZDHHC15  
ZDHHC9  
ZEB2  
ZFYVE26  
ZIC1  
ZIC2  
ZMIZ1  
ZMYND11  
ZNF148  
ZNF292  
ZNF407  
ZNF41  
ZNF462  
ZNF592  
ZNF674  
ZNF711  
ZNF81  
ZSWIM6

FAM126A  
FAM161A  
FAM20A  
FAM20C  
FAM83G  
FAM83H  
FANCA  
FANCB  
FANCC  
FANCD2  
FANCE  
FANCF  
FANCG  
FANCI  
FANCL  
FANCM  
FAR1  
FARS2  
FARSB  
FAS  
FASLG  
FASTKD2  
FAT2  
FAT4  
FBLN1  
FBLN5  
FBN1  
FBN2  
FBP1  
FBXL3  
FBXL4  
FBXO11  
FBXO31  
FBXO38  
FBXO7  
FCGR1A  
FCGR2A  
FCGR2B  
FCGR3A  
FCGR3B  
FCGRT  
FCN3  
FCYT  
FDPS  
FDX2  
FDXR  
FECH  
FERMT1

FERMT3  
FEZF1  
FFAR4  
FGA  
FGB  
FGD1  
FGD4  
FGF10  
FGF12  
FGF14  
FGF16  
FGF17  
FGF20  
FGF23  
FGF3  
FGF5  
FGF8  
FGF9  
FGFR1  
FGFR2  
FGFR3  
FGFR4  
FGG  
FHL1  
FHL2  
FIBP  
FIG4  
FIGLA  
FIGN  
FKBP10  
FKBP14  
FKBP5  
FKBPL  
FKRP  
FKTN  
FLAD1  
FLG  
FLG2  
FLI1  
FLJ22792  
FLNA  
FLNB  
FLNC  
FLRT3  
FLT3  
FLT4  
FLVCR1  
FLVCR2

FMN2  
FMO3  
FMR1  
FN1  
FOLR1  
FOS  
FOXC1  
FOXC2  
FOXD3  
FOXD4  
FOXE1  
FOXE3  
FOXF1  
FOXF2  
FOXG1  
FOXH1  
FOXI1  
FOXL1  
FOXL2  
FOXN1  
FOXO1  
FOXP1  
FOXP2  
FOXP3  
FOXRED1  
FPR1  
FRAS1  
FREM1  
FREM2  
FRMD4A  
FRMD7  
FRMPD4  
FRRS1L  
FRZB  
FSCN2  
FSHB  
FSHR  
FTCD  
FTH1  
FTL  
FTO  
FTSJ1  
FUCA1  
FUS  
FUT1  
FUT2  
FUT3  
FUT6

FUT8  
FUZ  
FXN  
FXD2  
FYCO1  
FZD4  
FZD6  
G6PC  
G6PC3  
G6PD  
GAA  
GABBR2  
GABRA1  
GABRA2  
GABRA3  
GABRB1  
GABRB2  
GABRB3  
GABRD  
GABRG2  
GAD1  
GAL  
GALC  
GALE  
GALK1  
GALNS  
GALNT11  
GALNT12  
GALNT3  
GALT  
GAMT  
GAN  
GANAB  
GARS  
GAS1  
GAS8  
GATA1  
GATA3  
GATA4  
GATA5  
GATA6  
GATAD1  
GATAD2B  
GATB  
GATC  
GATM  
GBA  
GBA2

GBE1  
GCDH  
GCGR  
GCH1  
GCK  
GCKR  
GCLC  
GCLM  
GCM2  
GCNT2  
GCSH  
GDAP1  
GDAP2  
GDF1  
GDF2  
GDF3  
GDF5  
GDF6  
GDI1  
GDNF  
GFAP  
GFER  
GFI1  
GFI1B  
GFM1  
GFM2  
GFPT1  
GGCX  
GH1  
GHR  
GHRHR  
GHRL  
GHSR  
GIGYF2  
GINS1  
GIPC3  
GJA1  
GJA3  
GJA5  
GJA8  
GJB1  
GJB2  
GJB3  
GJB4  
GJB6  
GJC2  
GK  
GLA



GLB1  
GLCCI1  
GLDC  
GLDN  
GLE1  
GLI2  
GLI3  
GLIS2  
GLIS3  
GLML  
GLMN  
GLRA1  
GLRB  
GLRX5  
GLUD1  
GLUD2  
GLUL  
GLYCK  
GM2A  
GMNN  
GMPPA  
GMPPB  
GNA11  
GNAI2  
GNAI3  
GNAL  
GNAO1  
GNAQ  
GNAS  
GNAS-AS1  
GNAT1  
GNAT2  
GNB1  
GNB3  
GNB4  
GNB5  
GNE  
GNMT  
GNPAT  
GNPTAB  
GNPTG  
GNRH1  
GNRHR  
GNS  
GORAB  
GOSR2  
GOT1  
GP1BA

GP1BB  
GP6  
GP9  
GPAA1  
GPC3  
GPC4  
GPC6  
GPD1  
GPD1L  
GPD2  
GPHN  
GPI  
GPIHBP1  
GPR101  
GPR143  
GPR161  
GPR179  
GPR68  
GPR88  
GPSM2  
GPT2  
GPX1  
GPX4  
GREM1  
GREM2  
GRHL2  
GRHL3  
GRHPR  
GRIA3  
GRIA4  
GRID2  
GRIK2  
GRIK4  
GRIN1  
GRIN2A  
GRIN2B  
GRIN2D  
GRIN3B  
GRIP1  
GRK1  
GRM1  
GRM6  
GRN  
GRXCR1  
GRXCR2  
GSBS  
GSC  
GSDME

GSE1  
GSN  
GSS  
GTF2E2  
GTF2H5  
GTPBP2  
GTPBP3  
GUCA1A  
GUCA1B  
GUCY1A1  
GUCY2C  
GUCY2D  
GUF1  
GUSB  
GYG1  
GYPA  
GYPB  
GYPC  
GYS1  
GYS2  
H19  
H6PD  
HAAO  
HACE1  
HADH  
HADHA  
HADHB  
HAL  
HAMP  
HAND1  
HAND2  
HARS  
HARS2  
HAS2  
HAVCR1  
HAX1  
HBA1  
HBA2  
HBB  
HBD  
HBG1  
HBG2  
HCCS  
HCFC1  
HCN1  
HCN4  
HCRT  
HDAC4

HDAC6  
HDAC8  
HDC  
HECTD1  
HECW2  
HELLS  
HEPACAM  
HERC1  
HERC2  
HES7  
HESX1  
HEXA  
HEXB  
HEY2  
HFE  
HFM1  
HGD  
HGF  
HGSNAT  
HIBCH  
HIKESHI  
HINT1  
HIST1H1E  
HIST1H4C  
HIVEP2  
HJV  
HK1  
HLA-A  
HLA-B  
HLA-C  
HLA-DPB1  
HLA-DQA1  
HLA-DQB1  
HLA-DRB1  
HLCS  
HMBS  
HMCN1  
HMGA1  
HMGB3  
HMGCL  
HMGCR  
HMGCS2  
HMMR  
HMOX1  
HMX1  
HNF1A  
HNF1B  
HNF4A

HNMT  
HNRNPA1  
HNRNPA2B1  
HNRNPDL  
HNRNPH2  
HNRNPK  
HNRNPU  
HOGA1  
HOMER2  
HOMEZ  
HOXA1  
HOXA11  
HOXA13  
HOXA2  
HOXB1  
HOXB13  
HOXC13  
HOXD10  
HOXD13  
HP  
HPCA  
HPD  
HPGD  
HPRT1  
HPS1  
HPS3  
HPS4  
HPS5  
HPS6  
HPSE2  
HR  
HRAS  
HRG  
HS6ST1  
HSD11B1  
HSD11B2  
HSD17B10  
HSD17B3  
HSD17B4  
HSD3B2  
HSD3B7  
HSF4  
HSPA1L  
HSPA9  
HSPB1  
HSPB3  
HSPB6  
HSPB8

HSPD1  
HSPG2  
HTR1A  
HTR2A  
HTRA1  
HTRA2  
HTT  
HUWE1  
HYAL1  
HYDIN  
HYLS1  
HYOU1  
IARS  
IARS2  
IBA57  
ICAM1  
ICAM4  
ICK  
ICOS  
IDH1  
IDH2  
IDH3B  
IDS  
IDUA  
IER3IP1  
IFIH1  
IFITM3  
IFITM5  
IFNAR2  
IFNG  
IFNGR1  
IFNGR2  
IFNL3  
IFRD1  
IFT122  
IFT140  
IFT172  
IFT27  
IFT43  
IFT52  
IFT74  
IFT80  
IFT81  
IFT88  
IGBP1  
IGF1  
IGF1R  
IGF2

IGF2BP2  
IGF2R  
IGFALS  
IGFBP7  
IGHMBP2  
IGLL1  
IGSF1  
IGSF3  
IHH  
IKBKB  
IKBKG  
IKZF1  
IL10  
IL10RA  
IL10RB  
IL11RA  
IL12B  
IL12RB1  
IL13  
IL17F  
IL17RA  
IL17RC  
IL17RD  
IL18  
IL1B  
IL1RAPL1  
IL1RN  
IL2  
IL21  
IL21R  
IL23R  
IL2RA  
IL2RG  
IL31RA  
IL36RN  
IL4R  
IL6  
IL6R  
IL6ST  
IL7R  
ILDR1  
ILK  
IMPA1  
IMPAD1  
IMPDH1  
IMPDH2  
IMPG1  
IMPG2

INF2  
ING1  
INO80  
INPP5D  
INPP5E  
INPP5K  
INPPL1  
INS  
INSL3  
INSR  
INVS  
IPMK  
IQCB1  
IQSEC2  
IRAK1  
IRAK3  
IRAK4  
IRF1  
IRF2BP2  
IRF2BPL  
IRF3  
IRF4  
IRF5  
IRF6  
IRF7  
IRF8  
IRGM  
IRS1  
IRS2  
IRX1  
IRX5  
ISCA2  
ISCU  
ISG15  
ISL1  
ISPD  
ITCH  
ITGA2B  
ITGA3  
ITGA6  
ITGA7  
ITGA8  
ITGAM  
ITGB1BP2  
ITGB2  
ITGB3  
ITGB4  
ITGB6



ITIH4  
ITK  
ITM2B  
ITPA  
ITPKC  
ITPR1  
ITPR2  
IVD  
IYD  
JAG1  
JAGN1  
JAK1  
JAK2  
JAK3  
JAM3  
JARID2  
JMJD1C  
JPH1  
JPH2  
JPH3  
JUP  
KALRN  
KANK1  
KANK2  
KANSL1  
KARS  
KAT6A  
KAT6B  
KATNB1  
KBTBD13  
KCNA1  
KCNA2  
KCNA4  
KCNA5  
KCNB1  
KCNC1  
KCNC3  
KCND3  
KCNE1  
KCNE2  
KCNE3  
KCNE5  
KCNH1  
KCNH2  
KCNJ1  
KCNJ10  
KCNJ11  
KCNJ13

KCNJ18  
KCNJ2  
KCNJ3  
KCNJ5  
KCNJ6  
KCNJ8  
KCNK18  
KCNK3  
KCNK9  
KCNMA1  
KCNMB1  
KCNN4  
KCNQ1  
KCNQ1OT1  
KCNQ2  
KCNQ3  
KCNQ4  
KCNQ5  
KCNT1  
KCNV2  
KCTD1  
KCTD17  
KCTD7  
KDF1  
KDM1A  
KDM5B  
KDM5C  
KDM6A  
KDR  
KDSR  
KEL  
KERA  
KHDC3L  
KHK  
KIAA0319  
KIAA0442  
KIAA0556  
KIAA0586  
KIAA0753  
KIAA1109  
KIDINS220  
KIF11  
KIF14  
KIF1A  
KIF1B  
KIF1BP  
KIF1C  
KIF20A

KIF21A  
KIF22  
KIF26B  
KIF2A  
KIF4A  
KIF5A  
KIF5C  
KIF7  
KIND1  
KIND3  
KIR3DL1  
KIRREL3  
KISS1  
KISS1R  
KITLG  
KIZ  
KL  
KLC2  
KLF1  
KLF11  
KLF6  
KLF7  
KLHDC8B  
KLHL10  
KLHL15  
KLHL24  
KLHL3  
KLHL40  
KLHL41  
KLHL7  
KLK1  
KLK4  
KLKB1  
KLLN  
KMT2A  
KMT2B  
KMT2C  
KMT2D  
KMT5B  
KNG1  
KNL1  
KPNA7  
KPTN  
KRAS  
KRBOX4  
KREMEN1  
KRIT1  
KRT1

KRT10  
KRT12  
KRT13  
KRT14  
KRT16  
KRT17  
KRT18  
KRT2  
KRT25  
KRT3  
KRT4  
KRT5  
KRT6A  
KRT6B  
KRT6C  
KRT71  
KRT74  
KRT75  
KRT8  
KRT81  
KRT83  
KRT85  
KRT86  
KRT9  
KTU  
KY  
KYNU  
L1CAM  
L2HGDH  
LACC1  
LACTB  
LAMA1  
LAMA2  
LAMA3  
LAMA4  
LAMB1  
LAMB2  
LAMB3  
LAMC1  
LAMC2  
LAMC3  
LAMP2  
LAMTOR2  
LARGE1  
LARP7  
LARS  
LARS2  
LAS1L

LAT  
LBN  
LBR  
LCA5  
LCAT  
LCK  
LCT  
LDB3  
LDHA  
LDHB  
LDLR  
LDLRAP1  
LEF1  
LEFTY1  
LEFTY2  
LEMD2  
LEMD3  
LEP  
LEPR  
LFNG  
LGALS2  
LGI1  
LGI4  
LGR4  
LHB  
LHCGR  
LHFPL5  
LHX3  
LHX4  
LIAS  
LIFR  
LIG1  
LIG4  
LIM2  
LIMS2  
LINGO1  
LINS1  
LIPA  
LIPC  
LIPE  
LIPG  
LIPH  
LIPI  
LIPN  
LIPT1  
LIPT2  
LITAF  
LMAN1

LMAN2L  
LMBR1  
LMBRD1  
LMF1  
LMNA  
LMNB1  
LMNB2  
LMOD3  
LMX1B  
LOC387715  
LONP1  
LOR  
LOX  
LOXHD1  
LOXL1  
LPA  
LPAR6  
LPIN1  
LPIN2  
LPL  
LPP  
LRAT  
LRBA  
LRIG2  
LRIT3  
LRMDA  
LRP1  
LRP2  
LRP4  
LRP5  
LRP6  
LRP8  
LRPAP1  
LRPPRC  
LRRC6  
LRRC8A  
LRRK2  
LRSAM1  
LRTOMT  
LSS  
LTA  
LTBP2  
LTBP3  
LTBP4  
LTC4S  
LUM  
LYRM4  
LYRM7

LYST  
LYZ  
LZTFL1  
LZTR1  
LZTS1  
MAB21L1  
MAB21L2  
MACF1  
MAD1L1  
MAD2L2  
MAF  
MAFB  
MAG  
MAGED2  
MAGEL2  
MAGI2  
MAGT1  
MAK  
MAL  
MALT1  
MAML1  
MAML2  
MAMLD1  
MAN1B1  
MAN2B1  
MANBA  
MAOA  
MAP1B  
MAP2K1  
MAP2K2  
MAP3K1  
MAP3K14  
MAP3K7  
MAP3K8  
MAPK1  
MAPK10  
MAPK8IP1  
MAPK8IP3  
MAPKAP3  
MAPKAPK3  
MAPKBP1  
MAPRE2  
MARS  
MARS2  
MARVELD2  
MASP1  
MASP2  
MASTL

MAT1A  
MAT2A  
MATN3  
MATN4  
MATR3  
MAU2  
MBD5  
MBL2  
MBOAT7  
MBTPS2  
MC1R  
MC2R  
MC3R  
MC4R  
MCC  
MCCC1  
MCCC2  
MCEE  
MCFD2  
MCIDAS  
MCM2  
MCM4  
MCM6  
MCM8  
MCM9  
MCOLN1  
MCP  
MCPH1  
MCT8  
MCTP2  
MCUR1  
MDH2  
MDM2  
MECOM  
MECP2  
MECR  
MED12  
MED13  
MED13L  
MED17  
MED20  
MED23  
MED25  
MEF2A  
MEF2C  
MEFV  
MEGF10  
MEGF8



MEIS2  
MEN1  
MEOX1  
MERTK  
MESP1  
MESP2  
METTL23  
MFAP5  
MFF  
MFN2  
MFRP  
MFSD2A  
MFSD8  
MGAT2  
MGME1  
MGP  
MIAT  
MIB1  
MICOS13  
MICU1  
MICU2  
MID1  
MID2  
MIEF2  
MIF  
MINPP1  
MIP  
MIPEP  
MIR17HG  
MIR184  
MIR204  
MIR2861  
MIR96  
MKKS  
MKRN3  
MKS1  
MLC1  
MLPH  
MLYCD  
MMAA  
MMAB  
MMACHC  
MMADHC  
MME  
MMP1  
MMP13  
MMP14  
MMP19

MMP2  
MMP20  
MMP21  
MMP3  
MMP9  
MMUT  
MN1  
MNX1  
MOCOS  
MOCS1  
MOCS2  
MOG  
MOGS  
MORC2  
MPC1  
MPDU1  
MPDZ  
MPI  
MPL  
MPLKIP  
MPV17  
MPZ  
MR1  
MRAP  
MRAP2  
MRE11  
MRM2  
MRPL12  
MRPL3  
MRPL40  
MRPL44  
MRPL57  
MRPS14  
MRPS16  
MRPS2  
MRPS22  
MRPS23  
MRPS34  
MRPS7  
MRRF  
MRTFA  
MS4A1  
MS4A2  
MSL3  
MSMB  
MSMO1  
MSN  
MSR1

MSRB3  
MST1R  
MSTN  
MSTO1  
MSX1  
MSX2  
MT-ATP6  
MT-ATP8  
MT-CO1  
MT-CO2  
MT-CO3  
MT-CYB  
MT-ND1  
MT-ND2  
MT-ND3  
MT-ND4  
MT-ND4L  
MT-ND5  
MT-ND6  
MT-RNR1  
MT-RNR2  
MT-TC  
MT-TE  
MT-TF  
MT-TH  
MT-TI  
MT-TK  
MT-TL1  
MT-TP  
MT-TQ  
MT-TS1  
MT-TS2  
MT-TT  
MTAP  
MTCP1  
MTFMT  
MTHFD1  
MTHFR  
MTM1  
MTMR14  
MTMR2  
MTNR1B  
MTO1  
MTOR  
MTPAP  
MTR  
MTRR  
MTTP

MUC1  
MUC5B  
MUC7  
MUSK  
MVD  
MVK  
MXI1  
MYB  
MYBPC1  
MYBPC3  
MYC  
MYCN  
MYD88  
MYF6  
MYH10  
MYH11  
MYH14  
MYH2  
MYH3  
MYH6  
MYH7  
MYH8  
MYH9  
MYL2  
MYL3  
MYL4  
MYLIP  
MYLK  
MYLK2  
MYO15A  
MYO18B  
MYO1A  
MYO1C  
MYO1E  
MYO1F  
MYO3A  
MYO5A  
MYO5B  
MYO6  
MYO7A  
MYO9B  
MYOC  
MYOM1  
MYOT  
MYOZ1  
MYOZ2  
MYPN  
MYSM1

MYT1L  
NAA10  
NAA15  
NACC1  
NADK2  
NAGA  
NAGLU  
NAGS  
NALCN  
NANOS1  
NANS  
NARS2  
NAT1  
NAT2  
NAT8L  
NAXE  
NBAS  
NBEA  
NBEAL2  
NBN  
NCF1  
NCF2  
NCF4  
NCR3  
NCSTN  
NDE1  
NDN  
NDP  
NDRG1  
NDST1  
NDUFA1  
NDUFA10  
NDUFA11  
NDUFA12  
NDUFA13  
NDUFA2  
NDUFA3  
NDUFA4  
NDUFA5  
NDUFA6  
NDUFA7  
NDUFA8  
NDUFA9  
NDUFAB1  
NDUFAB1  
NDUFAB2  
NDUFAB3  
NDUFAB4

NDUFAF5  
NDUFAF6  
NDUFAF7  
NDUFB1  
NDUFB10  
NDUFB11  
NDUFB2  
NDUFB3  
NDUFB4  
NDUFB5  
NDUFB6  
NDUFB7  
NDUFB8  
NDUFB9  
NDUFC1  
NDUFC2  
NDUFS1  
NDUFS2  
NDUFS3  
NDUFS4  
NDUFS5  
NDUFS6  
NDUFS7  
NDUFS8  
NDUFV1  
NDUFV2  
NDUFV3  
NEB  
NEBL  
NECAP1  
NECTIN1  
NECTIN4  
NEDD4L  
NEFH  
NEFL  
NEK1  
NEK2  
NEK8  
NEK9  
NEU1  
NEUROD1  
NEUROG3  
NEXMIF  
NEXN  
NF1  
NFAT5  
NFATC1  
NFE2L2

NFIA  
NFIK  
NFKB1  
NFKB2  
NFKBIA  
NFKBIL1  
NFS1  
NFU1  
NGF  
NGLY1  
NHEJ1  
NHLRC1  
NHP2  
NHS  
NID1  
NIN  
NIPA1  
NIPAL4  
NIPBL  
NKX2-1  
NKX2-5  
NKX2-6  
NKX3-2  
NLGN3  
NLGN4X  
NLRC4  
NLRP1  
NLRP12  
NLRP3  
NLRP7  
NME1  
NME8  
NMNAT1  
NNT  
NOBOX  
NOD2  
NODAL  
NOG  
NOL3  
NONO  
NOP10  
NOP56  
NOS2  
NOS3  
NOTCH1  
NOTCH2  
NPAT  
NPC1

NPC1L1  
NPC2  
NPHP1  
NPHP3  
NPHP4  
NPHS1  
NPHS2  
NPM1  
NPPA  
NPR2  
NPR2L  
NPRL2  
NPRL3  
NPSR1  
NQO1  
NR0B1  
NR0B2  
NR1D2  
NR1H4  
NR2E3  
NR2F1  
NR2F2  
NR3C1  
NR3C2  
NR4A2  
NR5A1  
NRAS  
NRG1  
NRIP1  
NRL  
NRP1  
NRXN1  
NSD1  
NSD2  
NSD3  
NSDHL  
NSMCE2  
NSMCE3  
NSMF  
NSUN2  
NSUN3  
NT5C2  
NT5C3A  
NT5E  
NTF4  
NTRK1  
NTRK2  
NUB1



NUBPL  
NUDT15  
NUMA1  
NUP107  
NUP155  
NUP188  
NUP205  
NUP214  
NUP62  
NUP93  
NUS1  
NXF5  
NYX  
OAS1  
OAT  
OBSL1  
OCA2  
OCLN  
OCRL  
ODAM  
ODAPH  
ODC1  
OFD1  
OGDH  
OGG1  
OGT  
OLR1  
OPA1  
OPA3  
OPCML  
OPHN1  
OPLAH  
OPN1LW  
OPN1MW  
OPN1SW  
OPTN  
OR2J3  
ORAI1  
ORC1  
ORC4  
ORC6  
OSBPL2  
OSGEP  
OSMR  
OSTM1  
OTC  
OTOA  
OTOF

OTOG  
OTOGL  
OTUD4  
OTUD6B  
OTULIN  
OTX2  
OVOL2  
OXA1L  
OXCT1  
P2RX1  
P2RX2  
P2RY12  
P3H1  
P3H2  
P4HA2  
P4HB  
P4HTM  
PABPN1  
PACS1  
PACS2  
PADI3  
PADI4  
PADI6  
PAFAH1B1  
PAH  
PAK3  
PALLD  
PAM16  
PANK2  
PANX1  
PAPSS2  
PARK7  
PARN  
PARS2  
PAX1  
PAX2  
PAX3  
PAX4  
PAX6  
PAX7  
PAX8  
PAX9  
PAXX  
PBRM1  
PBX1  
PC  
PCARE  
PCBD1

PCCA  
PCCB  
PCDH15  
PCDH19  
PCGF2  
PCLO  
PCNA  
PCNT  
PCSK1  
PCSK9  
PCYT1A  
PDCD1  
PDCD10  
PDCN  
PDE10A  
PDE11A  
PDE3A  
PDE4D  
PDE6A  
PDE6B  
PDE6C  
PDE6D  
PDE6G  
PDE6H  
PDE8B  
PDGFB  
PDGFRB  
PDGFRL  
PDHA1  
PDHB  
PDHX  
PDIA2  
PDK1  
PDK2  
PDK3  
PDK4  
PDLIM3  
PDP1  
PDSS1  
PDSS2  
PDX1  
PDYN  
PDZD7  
PEPD  
PER2  
PER3  
PERP  
PET100

PET117  
PEX1  
PEX10  
PEX11B  
PEX12  
PEX13  
PEX14  
PEX16  
PEX19  
PEX2  
PEX26  
PEX3  
PEX5  
PEX6  
PEX7  
PFKM  
PFN1  
PGAM2  
PGAP1  
PGAP2  
PGAP3  
PGK1  
PGM1  
PGM3  
PHB  
PHC1  
PHEX  
PHF11  
PHF21A  
PHF6  
PHF8  
PHGDH  
PHIP  
PHKA1  
PHKA2  
PHKB  
PHKG2  
PHOX2A  
PHOX2B  
PHYH  
PHYKPL  
PI4KA  
PIBF1  
PICALM  
PIEZO1  
PIEZO2  
PIFO  
PIGA

PIGC  
PIGG  
PIGL  
PIGM  
PIGN  
PIGO  
PIGT  
PIGV  
PIGW  
PIGY  
PIH1D3  
PIK3CA  
PIK3CD  
PIK3R1  
PIK3R2  
PIK3R5  
PIKFYVE  
PINK1  
PIP5K1C  
PITPNM3  
PITRM1  
PITX1  
PITX2  
PITX3  
PJVK  
PKD1  
PKD1L1  
PKD2  
PKHD1  
PKLR  
PKP1  
PKP2  
PLA2G2A  
PLA2G4A  
PLA2G5  
PLA2G6  
PLA2G7  
PLAA  
PLAG1  
PLAGL1  
PLAU  
PLCB1  
PLCB4  
PLCD1  
PLCE1  
PLCG2  
PLCZ1  
PLD1

PLD3  
PLEC  
PLEKHG2  
PLEKHG5  
PLEKHM1  
PLEKHM2  
PLG  
PLIN1  
PLK4  
PLN  
PLOD1  
PLOD2  
PLOD3  
PLP1  
PLPBP  
PLS3  
PLTP  
PLVAP  
PLXND1  
PML  
PMM2  
PMP22  
PMPCA  
PMPCB  
PMVK  
PNKD  
PNKP  
PNLIP  
PNP  
PNPLA1  
PNPLA2  
PNPLA6  
PNPLA8  
PNPO  
PNPT1  
POC1A  
POC1B  
PODXL  
POF1B  
POFUT1  
POGLUT1  
POGZ  
POLA1  
POLE  
POLE2  
POLG  
POLG2  
POLH

POLR1A  
POLR1C  
POLR1D  
POLR3A  
POLR3B  
POMC  
POMGNT1  
POMGNT2  
POMK  
POMP  
POMT1  
POMT2  
PON1  
PON2  
POR  
PORCN  
POU1F1  
POU3F3  
POU3F4  
POU4F3  
POU6F2  
PPA2  
PPARA  
PPARG  
PPARGC1B  
PPCS  
PPIB  
PPL  
PPM1D  
PPM1K  
PPOX  
PPP1CB  
PPP1R15B  
PPP1R3A  
PPP2CA  
PPP2R1A  
PPP2R1B  
PPP2R2B  
PPP2R5B  
PPP2R5C  
PPP2R5D  
PPP3CA  
PPT1  
PQBP1  
PRCC  
PRCD  
PRDM1  
PRDM12

PRDM16  
PRDM5  
PRDM6  
PRDM8  
PREPL  
PRF1  
PRG4  
PRICKLE1  
PRICKLE2  
PRIMPOL  
PRKAA1  
PRKACA  
PRKACG  
PRKAG2  
PRKAG3  
PRKCA  
PRKCD  
PRKCG  
PRKCH  
PRKCSH  
PRKD1  
PRKDC  
PRKG1  
PRKN  
PRKRA  
PRLR  
PRMT7  
PRNP  
PROC  
PRODH  
PROK2  
PROKR2  
PROM1  
PROP1  
PROS1  
PROX1  
PROZ  
PRPF3  
PRPF31  
PRPF4  
PRPF6  
PRPF8  
PRPH  
PRPH2  
PRPS1  
PRR12  
PRRT2  
PRRX1



PRSS1  
PRSS12  
PRSS56  
PRUNE1  
PRX  
PSAP  
PSAT1  
PSENN  
PSMA3  
PSMA6  
PSMB4  
PSMB8  
PSMB9  
PSMC3IP  
PSMD12  
PSMG2  
PSPH  
PSTPIP1  
PTCH1  
PTCH2  
PTCHD1  
PTDSS1  
PTEN  
PTF1A  
PTGDR  
PTGER2  
PTGIS  
PTH  
PTH1R  
PTHB1  
PTHLH  
PTPN1  
PTPN11  
PTPN12  
PTPN14  
PTPN22  
PTPRC  
PTPRF  
PTPRJ  
PTPRO  
PTPRQ  
PTRH2  
PTRHD1  
PTS  
PUF60  
PUM1  
PURA  
PUS1

PUS3  
PUS7  
PXDN  
PYCR1  
PYCR2  
PYGL  
PYGM  
PYROXD1  
QARS  
QDPR  
QRICH1  
QRSL1  
RAB10  
RAB11B  
RAB18  
RAB23  
RAB27A  
RAB28  
RAB33B  
RAB39B  
RAB3GAP1  
RAB3GAP2  
RAB40AL  
RAB7A  
RAC1  
RAC2  
RAD21  
RAD50  
RAD51  
RAD51B  
RAD54B  
RAD54L  
RAF1  
RAG1  
RAG2  
RAI1  
RALA  
RANBP2  
RANGRF  
RAP1GDS1  
RAPSN  
RARB  
RARS  
RARS2  
RASA1  
RASGRP1  
RASGRP2  
RAX

RAX2  
RB1  
RB1CC1  
RBBP8  
RBCK1  
RBFOX1  
RBFOX2  
RBM10  
RBM20  
RBM28  
RBM8A  
RBMX  
RBP3  
RBP4  
RBPJ  
RCBTB1  
RD3  
RDH11  
RDH12  
RDH5  
RDX  
RECQL2  
RECQL3  
RECQL4  
REEP1  
REEP2  
REEP6  
RELB  
RELN  
REN  
RERE  
REST  
RET  
RETN  
RETREG1  
REV3L  
RFT1  
RFX5  
RFX6  
RFXANK  
RFXAP  
RGR  
RGS9  
RGS9BP  
RHAG  
RHBDF2  
RHCE  
RHD

RHEB  
RHO  
RHOBTB2  
RHOH  
RIL  
RIMS1  
RIN2  
RIPK1  
RIPK4  
RIPOR2  
RIPPLY2  
RIT1  
RLBP1  
RLIM  
RMND1  
RMRP  
RNASEH1  
RNASEH2A  
RNASEH2B  
RNASEH2C  
RNASEL  
RNASET2  
RNF113A  
RNF125  
RNF135  
RNF139  
RNF168  
RNF170  
RNF212  
RNF213  
RNF216  
RNF31  
RNF6  
RNU4ATAC  
ROBO1  
ROBO2  
ROBO3  
ROBO4  
ROCK2  
ROGDI  
ROM1  
ROR2  
RORA  
RORC  
RP1  
RP1L1  
RP2  
RP9

RPE65  
RPGR  
RPGRIP1  
RPGRIP1L  
RPIA  
RPL10  
RPL11  
RPL15  
RPL21  
RPL26  
RPL35A  
RPL5  
RPS10  
RPS14  
RPS15  
RPS17  
RPS19  
RPS24  
RPS26  
RPS28  
RPS29  
RPS6KA3  
RPS7  
RPSA  
RRAS2  
RREB1  
RRM2B  
RS1  
RSPH1  
RSPH3  
RSPH4A  
RSPH9  
RSPO1  
RSPO4  
RSPRY1  
RSRC1  
RTEL1  
RTN2  
RTN4IP1  
RTN4R  
RTTN  
RUBCN  
RUNX2  
RUSC2  
RXFP2  
RXYLT1  
RYR1  
RYR2

S1PR2  
SACS  
SAG  
SALL1  
SALL2  
SALL4  
SAMD9  
SAMD9L  
SAMHD1  
SANS  
SAR1B  
SARDH  
SARS  
SARS2  
SART3  
SASH1  
SASS6  
SATB2  
SBDS  
SBF1  
SBF2  
SC5D  
SCAPER  
SCARB1  
SCARB2  
SCARF2  
SCGB3A2  
SCN10A  
SCN11A  
SCN1A  
SCN1B  
SCN2A  
SCN2B  
SCN3A  
SCN3B  
SCN4A  
SCN4B  
SCN5A  
SCN8A  
SCN9A  
SCNN1A  
SCNN1B  
SCNN1G  
SCO1  
SCO2  
SCP2  
SCYL1  
SDC3

SDCCAG8  
SDHAF1  
SDHB  
SDR9C7  
SEC23A  
SEC23B  
SEC24C  
SEC24D  
SEC61A1  
SEC63  
SECISBP2  
SELENON  
SELP  
SEMA3A  
SEMA3D  
SEMA3E  
SEMA4A  
SEMA7A  
SEPSECS

Sep/12  
Sep/09

SERAC1  
SERPINA1  
SERPINA3  
SERPINA6  
SERPINA7  
SERPINB6  
SERPINB7  
SERPINB8  
SERPINC1  
SERPIND1  
SERPINE1  
SERPINF1  
SERPINF2  
SERPING1  
SERPINH1  
SERPINI1  
SESN1  
SET  
SETBP1  
SETD1A  
SETD1B  
SETD2  
SETD5  
SETX  
SF1  
SF3B1  
SF3B4

SFRP4  
SFTPA1  
SFTPA2  
SFTPB  
SFTPC  
SFXN4  
SGCA  
SGCB  
SGCD  
SGCE  
SGCG  
SGO1  
SGPL1  
SGSH  
SH2B1  
SH2B3  
SH2D1A  
SH3BP2  
SH3PXD2B  
SH3TC2  
SHANK2  
SHANK3  
SHH  
SHOC2  
SHOX  
SHOXY  
SHPK  
SHROOM3  
SHROOM4  
SI  
SIAE  
SIGMAR1  
SIK1  
SIL1  
SIM1  
SIN3A  
SIPA1L3  
SIX1  
SIX2  
SIX3  
SIX5  
SIX6  
SKI  
SKIV2L  
SLC10A2  
SLC10A7  
SLC11A1  
SLC11A2



SLC12A1  
SLC12A3  
SLC12A5  
SLC12A6  
SLC13A5  
SLC14A1  
SLC16A1  
SLC16A12  
SLC16A2  
SLC17A3  
SLC17A5  
SLC17A8  
SLC17A9  
SLC18A3  
SLC19A2  
SLC19A3  
SLC1A1  
SLC1A2  
SLC1A3  
SLC1A4  
SLC20A1  
SLC20A2  
SLC22A12  
SLC22A18  
SLC22A4  
SLC22A5  
SLC24A1  
SLC24A4  
SLC24A5  
SLC25A1  
SLC25A10  
SLC25A12  
SLC25A13  
SLC25A15  
SLC25A19  
SLC25A20  
SLC25A21  
SLC25A22  
SLC25A24  
SLC25A26  
SLC25A3  
SLC25A32  
SLC25A38  
SLC25A4  
SLC25A42  
SLC25A46  
SLC26A1  
SLC26A2

SLC26A3  
SLC26A4  
SLC26A5  
SLC26A8  
SLC27A4  
SLC27A5  
SLC29A3  
SLC2A1  
SLC2A10  
SLC2A2  
SLC2A9  
SLC30A10  
SLC30A2  
SLC30A8  
SLC33A1  
SLC34A1  
SLC34A2  
SLC34A3  
SLC35A1  
SLC35A2  
SLC35A3  
SLC35C1  
SLC35D1  
SLC36A2  
SLC37A4  
SLC38A8  
SLC39A12  
SLC39A13  
SLC39A14  
SLC39A4  
SLC39A5  
SLC39A8  
SLC3A1  
SLC40A1  
SLC41A1  
SLC45A2  
SLC46A1  
SLC4A1  
SLC4A10  
SLC4A11  
SLC4A4  
SLC52A1  
SLC52A2  
SLC52A3  
SLC5A1  
SLC5A2  
SLC5A5  
SLC5A7

SLC6A1  
SLC6A14  
SLC6A17  
SLC6A19  
SLC6A2  
SLC6A20  
SLC6A3  
SLC6A4  
SLC6A5  
SLC6A8  
SLC6A9  
SLC7A14  
SLC7A7  
SLC7A9  
SLC9A1  
SLC9A3  
SLC9A3R1  
SLC9A6  
SLC9A7  
SLC9A9  
SLCO1B1  
SLCO1B3  
SLCO2A1  
SLFN14  
SLITRK1  
SLITRK6  
SLMAP  
SLURP1  
SLURP2  
SLX4  
SMAC  
SMAD1  
SMAD2  
SMAD3  
SMAD4  
SMAD6  
SMAD7  
SMAD9  
SMARCA1  
SMARCA2  
SMARCA4  
SMARCAD1  
SMARCAL1  
SMARCB1  
SMARCC2  
SMARCD2  
SMARCE1  
SMC1A

SMC3  
SMCHD1  
SMG9  
SMIM1  
SMN1  
SMN2  
SMO  
SMOC1  
SMOC2  
SMPD1  
SMPX  
SMS  
SNAI2  
SNAP25  
SNAP29  
SNCA  
SNCAIP  
SNCB  
SNIP1  
SNORA2C  
SNORD118  
SNRNP200  
SNRPB  
SNRPE  
SNRPN  
SNTA1  
SNX10  
SNX14  
SOBP  
SOCS4  
SOD1  
SOD2  
SOD3  
SOHLH1  
SON  
SORL1  
SORT1  
SOS1  
SOS2  
SOST  
SOX10  
SOX11  
SOX17  
SOX18  
SOX2  
SOX3  
SOX4  
SOX5

SOX9  
SP110  
SP7  
SPAG1  
SPARC  
SPART  
SPAST  
SPATA16  
SPATA5  
SPATA7  
SPECC1L  
SPEG  
SPG11  
SPG21  
SPG7  
SPINK1  
SPINK5  
SPINT2  
SPOCK1  
SPPL2A  
SPR  
SPRED1  
SPRTN  
SPRY2  
SPRY4  
SPTA1  
SPTAN1  
SPTB  
SPTBN2  
SPTLC1  
SPTLC2  
SQSTM1  
SRC  
SRCAP  
SRD5A2  
SRD5A3  
SRGAP1  
SRP72  
SRPX2  
SRY  
SSR4  
SSTR5  
SSX1  
SSX2  
ST14  
ST3GAL3  
ST3GAL5  
STAC3

STAG1  
STAG3  
STAMBP  
STAP1  
STAR  
STAT1  
STAT2  
STAT3  
STAT4  
STAT5B  
STAT6  
STEAP3  
STIL  
STIM1  
STK4  
STN1  
STOX1  
STRA6  
STRADA  
STRC  
STS  
STT3A  
STT3B  
STUB1  
STX11  
STX16  
STX1B  
STX3  
STXBP1  
STXBP2  
SUCLA2  
SUCLG1  
SUCLG2  
SUFU  
SUGCT  
SULF1  
SULT2B1  
SUMF1  
SUMO1  
SUMO4  
SUN5  
SUOX  
SURF1  
SUZ12  
SVBP  
SYCE1  
SYCP3  
SYN1

SYN2  
SYNCRIP  
SYNE1  
SYNE2  
SYNE4  
SYNGAP1  
SYNJ1  
SYP  
SYT1  
SYT14  
SYT2  
SZT2  
TAB2  
TAC3  
TACO1  
TACR3  
TACSTD2  
TAF1  
TAF13  
TAF2  
TAF4B  
TAF6  
TAL1  
TAL2  
TALDO1  
TANC2  
TANGO2  
TAP1  
TAP2  
TAPBP  
TAPT1  
TARDBP  
TARS2  
TAS2R16  
TAS2R38  
TAT  
TAZ  
TBC1D20  
TBC1D23  
TBC1D24  
TBC1D4  
TBC1D7  
TBCD  
TBCE  
TBCK  
TBK1  
TBL1XR1  
TBL1Y

TBP  
TBR1  
TBX1  
TBX15  
TBX18  
TBX19  
TBX2  
TBX20  
TBX21  
TBX22  
TBX3  
TBX4  
TBX5  
TBX6  
TBXA2R  
TBXAS1  
TBXT  
TCAP  
TCF12  
TCF20  
TCF3  
TCF4  
TCF7L2  
TCHH  
TCIRG1  
TCN2  
TCOF1  
TCTN1  
TCTN2  
TCTN3  
TDGF1  
TDP1  
TDP2  
TDRD7  
TEAD1  
TECPR2  
TECR  
TECRL  
TECT1  
TECTA  
TEK  
TELO2  
TENM1  
TENM3  
TENM4  
TERC  
TERF2IP  
TET2



TEX11  
TF  
TFAM  
TFAP2A  
TFAP2B  
TFE3  
TFG  
TFR2  
TFRC  
TG  
TGDS  
TGFB1  
TGFB2  
TGFB3  
TGFB1  
TGFB1  
TGFB2  
TGFB3  
TGIF1  
TGM1  
TGM3  
TGM5  
TGM6  
TH  
THAP1  
THBD  
THBS1  
THBS2  
THG1L  
THOC2  
THOC6  
THPO  
THRA  
THRB  
TIA1  
TICAM1  
TIMM44  
TIMM50  
TIMM8A  
TIMMDC1  
TIMP3  
TINF2  
TIRAP  
TJP2  
TK2  
TKT  
TLE6  
TLK2

TLL1  
TLR1  
TLR2  
TLR3  
TLR4  
TLR5  
TM4SF20  
TMC1  
TMC6  
TMC8  
TMCO1  
TMEM107  
TMEM126A  
TMEM126B  
TMEM138  
TMEM165  
TMEM17  
TMEM173  
TMEM186  
TMEM199  
TMEM216  
TMEM231  
TMEM237  
TMEM240  
TMEM38B  
TMEM43  
TMEM65  
TMEM67  
TMEM70  
TMEM98  
TMIE  
TMLHE  
TMPO  
TMPRSS15  
TMPRSS3  
TMPRSS6  
TMTC3  
TNC  
TNF  
TNFAIP3  
TNFRSF10B  
TNFRSF11A  
TNFRSF11B  
TNFRSF13B  
TNFRSF13C  
TNFRSF1A  
TNFRSF4  
TNFSF11

TNFSF12  
TNFSF4  
TNIK  
TNNC1  
TNNI2  
TNNI3  
TNNI3K  
TNNT1  
TNNT2  
TNNT3  
TNPO3  
TNXB  
TOE1  
TOP1  
TOP2A  
TOPORS  
TOR1A  
TOR1AIP1  
TOR1AIP2  
TP53RK  
TP63  
TPCN2  
TPH2  
TPI1  
TPK1  
TPM1  
TPM2  
TPM3  
TPMT  
TPO  
TPP1  
TPP2  
TPRKB  
TPRN  
TRAF3  
TRAF3IP1  
TRAF3IP2  
TRAF6  
TRAF7  
TRAIP  
TRAP1  
TRAPPC11  
TRAPPC2  
TRAPPC6B  
TRAPPC9  
TRDN  
TREM2  
TREX1

TRH  
TRHR  
TRIM2  
TRIM32  
TRIM37  
TRIM44  
TRIO  
TRIOBP  
TRIP11  
TRIP12  
TRIP4  
TRIT1  
TRMT1  
TRMT10A  
TRMT10C  
TRMT5  
TRMU  
TRNH  
TRNI  
TRNK  
TRNP1  
TRNQ  
TRNS2  
TRNT  
TRNT1  
TRPA1  
TRPC3  
TRPC4  
TRPC6  
TRPM1  
TRPM2  
TRPM4  
TRPM6  
TRPM7  
TRPS1  
TRPV3  
TRPV4  
TRRAP  
TSC1  
TSC2  
TSEN15  
TSEN2  
TSEN34  
TSEN54  
TSFM  
TSG101  
TSHB  
TSHR

TSHZ1  
TSPAN12  
TSPAN7  
TSPEAR  
TSPYL1  
TSR2  
TTBK2  
TTC19  
TTC21B  
TTC25  
TTC37  
TTC7A  
TTC8  
TTI2  
TLL5  
TTN  
TTPA  
TTR  
TUB  
TUBA1A  
TUBA4A  
TUBA8  
TUBB  
TUBB1  
TUBB2A  
TUBB2B  
TUBB3  
TUBB4A  
TUBB8  
TUBG1  
TUBGCP4  
TUBGCP6  
TUFM  
TUFT1  
TULP1  
TUSC3  
TWIST1  
TWIST2  
TWNK  
TXN2  
TXNL4A  
TXNRD2  
TYK2  
TYMP  
TYR  
TYROBP  
TYRP1  
UBA1

UBA5  
UBE2A  
UBE2T  
UBE3A  
UBE3B  
UBIAD1  
UBQLN2  
UBR1  
UBTF  
UCL1  
UCP1  
UCP2  
UCP3  
UFC1  
UFD1  
UFM1  
UFSP2  
UGT1A1  
UGT1A4  
UGT1A5  
UGT2B17  
UMOD  
UMPS  
UNC119  
UNC13A  
UNC13D  
UNC45B  
UNC80  
UNC93B1  
UNG  
UPB1  
UPF3B  
UPK3A  
UQCC1  
UQCC2  
UQCC3  
UQCR10  
UQCR11  
UQCRB  
UQCRC1  
UQCRC2  
UQCRFS1  
UQCRH  
UQCRQ  
UROC1  
UROD  
UROS  
USB1

USF1  
USH1C  
USH1G  
USH2A  
USP18  
USP27X  
USP7  
USP9X  
USP9Y  
UTP4  
UVRAG  
UVSSA  
VAC14  
VAMP1  
VAMP2  
VANGL1  
VANGL2  
VAPB  
VAR52  
VAV1  
VAX1  
VCAN  
VCL  
VCP  
VDR  
VEGFA  
VEGFC  
VHL  
VIL1  
VIM  
VIPAS39  
VKORC1  
VLDLR  
VMA21  
VNN1  
VPS11  
VPS13A  
VPS13B  
VPS13C  
VPS13D  
VPS33A  
VPS33B  
VPS35  
VPS37A  
VPS39  
VPS45  
VPS53  
VRK1

VSX1  
VSX2  
VWA3B  
VWF  
WAC  
WARS2  
WAS  
WASF1  
WASHC4  
WASHC5  
WDPCP  
WDR1  
WDR11  
WDR13  
WDR19  
WDR26  
WDR34  
WDR35  
WDR36  
WDR4  
WDR45  
WDR45B  
WDR60  
WDR62  
WDR72  
WDR73  
WDR81  
WFS1  
WHRN  
WIPF1  
WNK1  
WNK4  
WNT1  
WNT10A  
WNT10B  
WNT2B  
WNT3  
WNT4  
WNT5A  
WNT7A  
WRAP53  
WRN  
WT1  
WWC1  
WWOX  
XBP1  
XDH  
XEDAR



XG  
XIAP  
XIST  
XK  
XPA  
XPC  
XPNPEP2  
XPNPEP3  
XPR1  
XRCC2  
XRCC3  
XRCC4  
XRCC5  
XRCC6  
XYLT1  
XYLT2  
YAP1  
YARS  
YARS2  
YME1L1  
YWHAE  
YWHAG  
YY1  
YY1AP1  
ZAK  
ZAP70  
ZBTB11  
ZBTB16  
ZBTB18  
ZBTB20  
ZBTB24  
ZBTB42  
ZC3H14  
ZC4H2  
ZDHHC15  
ZDHHC9  
ZEB1  
ZEB2  
ZFAT  
ZFH3  
ZFP57  
ZFPM2  
ZFYVE26  
ZFYVE27  
ZIC1  
ZIC2  
ZIC3  
ZIC4

ZIM2  
ZMIZ1  
ZMPSTE24  
ZMYM3  
ZMYND10  
ZMYND11  
ZMYND15  
ZNF141  
ZNF148  
ZNF252P  
ZNF292  
ZNF335  
ZNF365  
ZNF407  
ZNF408  
ZNF41  
ZNF423  
ZNF462  
ZNF469  
ZNF480  
ZNF513  
ZNF565  
ZNF592  
ZNF644  
ZNF674  
ZNF687  
ZNF711  
ZNF750  
ZNF81  
ZP1  
ZSWIM6
